# Supplementary material for: Dehydrogenative synthesis of benzimidazoles under mild conditions with supported iridium catalysts
Source: Royal Society of Chemistry journal article supplement (doi:10.1039/c5cy01601k), 2015-10-08
Supplement: c5cy01601k1.pdf [file c5cy01601k1.pdf]

## Supporting Information

### Dehydrogenative Synthesis of Benzimidazoles under Mild Conditions with Supported Iridium Catalysts

Keisuke Tateyama<sup>[a]</sup> Kenji Wada,<sup>\*,[b]</sup> Hiroki Miura,<sup>[a,c,d]</sup> Saburo Hosokawa,<sup>[d]</sup> Ryu Abe,<sup>[a]</sup> and Masashi Inoue<sup>[a]</sup>

<sup>a</sup> Department of Energy and Hydrocarbon Chemistry, Graduate School of Engineering, Kyoto University, Katsura, Nishikyo-ku, Kyoto 615-8510 (Japan)

<sup>b</sup> Department of Chemistry for Medicine, Graduate School of Medicine, Kagawa University, 1750-1 Ikenobe, Miki-cho, Kita-gun, Kagawa 761-0793 (Japan) Phone +81-87-891-2249, Fax +81-87-891-2249, e-mail: wadaken@med.kagawa-u.ac.jp

<sup>c</sup> Department of Urban Environmental Sciences, Tokyo Metropolitan University, 1-1 Minami-Osawa, Hachioji-shi, Tokyo 192-0397 (Japan)

<sup>d</sup> Elements Strategy Initiative for Catalysts & Batteries (ESICB), Kyoto University, 1-30 Goryo-Ohara, Nishikyo-ku, Kyoto 615-8245 (Japan)

#### Contents:

1. Characterization of the catalysts
2. Dehydrogenation of benzyl alcohol by the Ir/TiO<sub>2</sub> catalyst

References

## 1. Characterization of the catalysts

### Nitrogen gas adsorption of supported iridium catalysts

The BET surface areas of supported iridium catalysts just after calcination at 300 °C for 30 min were calculated from nitrogen gas adsorption isotherms. The results are summarized in Table S1. There was no distinct correlation between the surface area and catalytic activity: For example, silica-supported catalyst has a higher surface area than titania-supported catalysts, but was not effective for the present reaction.

Table S1. BET surface areas of supported iridium catalysts

| Entry | Ir catalyst <sup>a</sup>                   | Surface area (m <sup>2</sup> g <sup>-1</sup> ) |
|-------|--------------------------------------------|------------------------------------------------|
| 1     | Ir(2.0 wt%)/TiO <sub>2</sub>               | 44                                             |
| 2     | Ir(2.0 wt%)/ZrO <sub>2</sub>               | 96                                             |
| 3     | Ir(2.0 wt%)/Al <sub>2</sub> O <sub>3</sub> | 150                                            |
| 4     | Ir(2.0 wt%)/CeO <sub>2</sub>               | 79                                             |
| 5     | Ir(2.0 wt%)/MgO                            | 156                                            |
| 6     | Ir(2.0 wt%)/SiO <sub>2</sub>               | 157                                            |

<sup>a</sup> Calcined at 300 °C for 30 min in air.

### XRD study of supported iridium catalysts

Fig. S1 shows XRD patterns of the Ir/TiO<sub>2</sub> and Ir/CeO<sub>2</sub> catalysts before and after the reduction at 500 °C. The Ir/TiO<sub>2</sub> catalysts showed diffraction peaks due to rutile and anatase forms, and the Ir/CeO<sub>2</sub> catalysts showed patterns that can be assigned to cubic ceria. The reductive treatment at 500 °C for 30 min did not affect XRD patterns of all these catalysts. Remarkably, No other diffraction peaks were observed: The absence of peaks due to crystalline IrO<sub>2</sub> indicates that iridium species on these supports are highly dispersed.

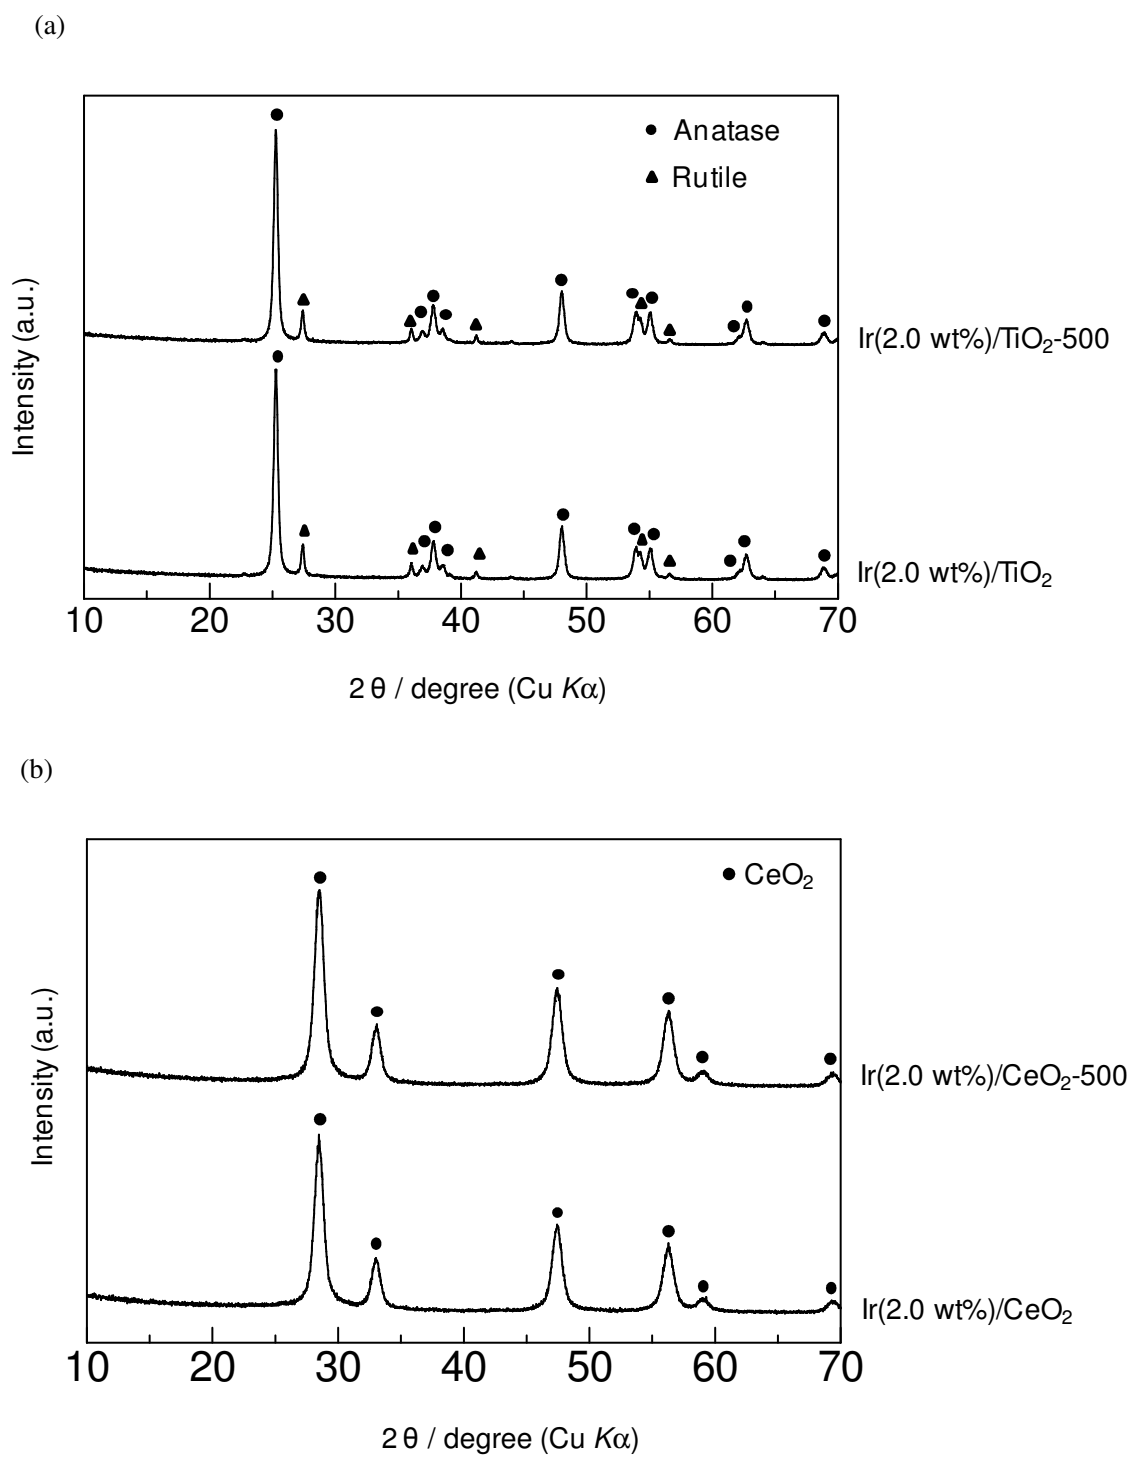

Fig. S1. XRD patterns of (a) Ir(2.0 wt%)/TiO<sub>2</sub> and (b) Ir(2.0 wt%)/CeO<sub>2</sub> catalysts before and after the treatment in a H<sub>2</sub> (2.0 vol%)/Ar flow (180 cm<sup>3</sup> min<sup>-1</sup>) at 500 °C for 30 min.

## XP spectra of supported iridium catalysts.

The Ir 4f XP spectra of supported iridium catalysts reduced at 500 °C are shown in Fig. S2. The surface ratios of Ir(0) species (Ir 4f<sub>7/2</sub> 60.7 eV) and high-valent Ir species (Ir 4f<sub>7/2</sub> 62.0 eV)<sup>[1]</sup> depended on the metal oxide supports.

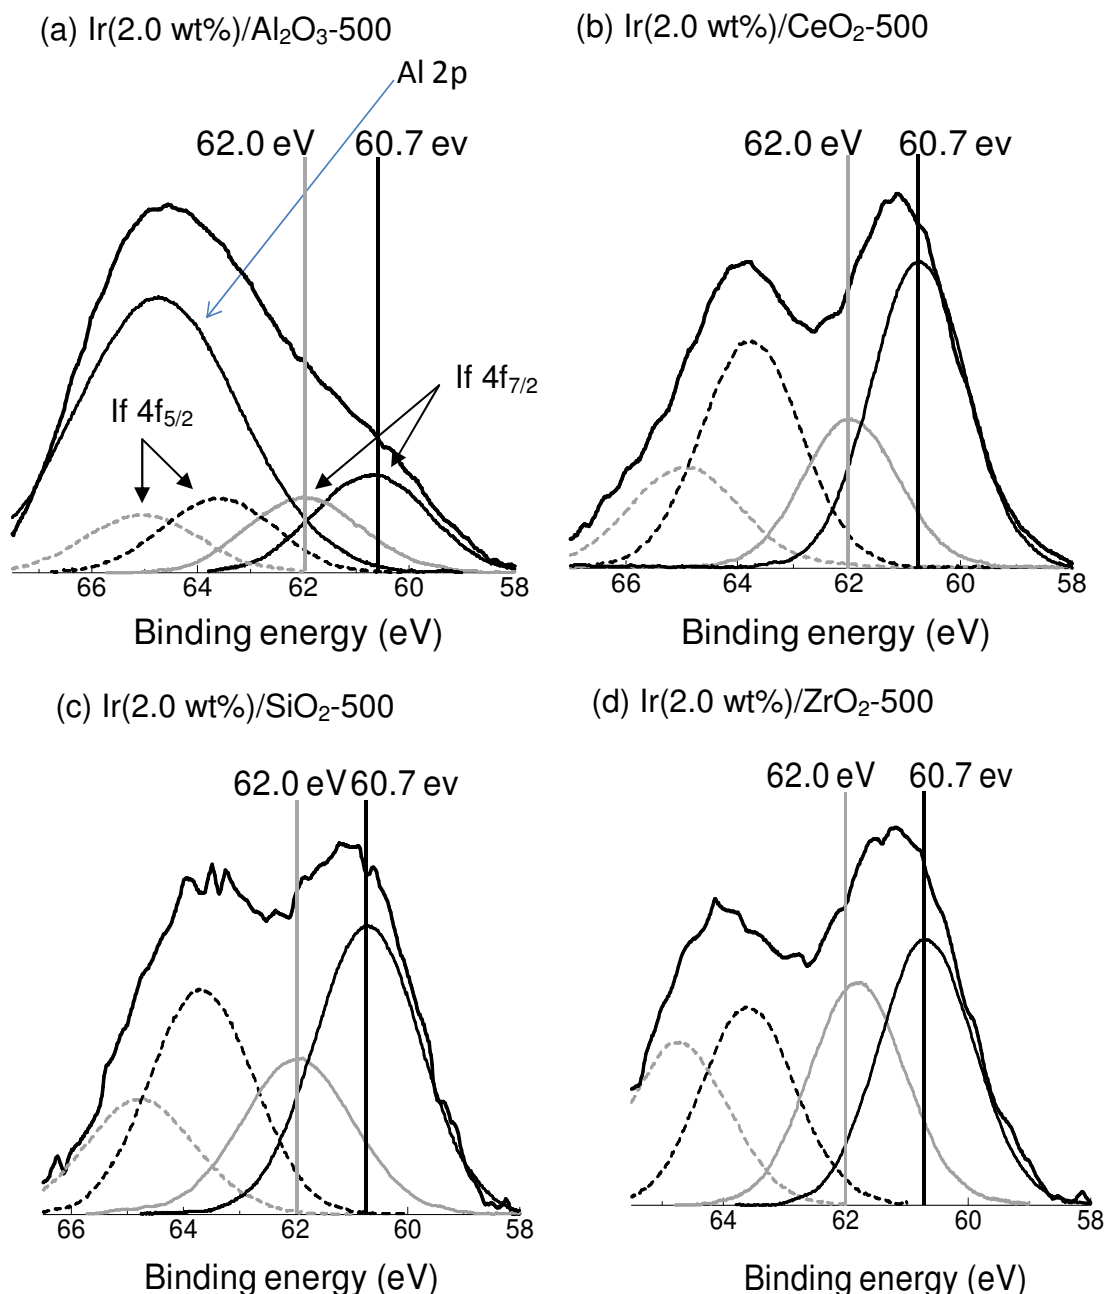

Fig. S2. Ir 4f XP spectra of the catalysts after the treatment a H<sub>2</sub> (2.0 vol%)/Ar flow (180 cm<sup>3</sup> min<sup>-1</sup>) at 500 °C for 30 min. An Al 2p<sub>3/2</sub> satellite peak was seen at 64.7 eV in the spectrum of Ir(2.0 wt%)/Al<sub>2</sub>O<sub>3</sub>-500.

### Temperature-programmed reduction (TPR) profiles of supported iridium catalysts.

The H<sub>2</sub>-TPR profiles of supported iridium catalysts and that of the ceria support are shown in Fig. S3. For all of the catalysts except for Ir/MgO, reduction peaks of oxidized iridium appeared at below 250 °C, whereas the reduction of oxidized Ir/MgO occurred at a higher temperature. Bulk IrO<sub>2</sub> was reduced at around 100 °C. A broad peak observed for Ir/CeO<sub>2</sub> above 600 °C has been reported to be responsible for the reduction of bulk CeO<sub>2</sub>.<sup>[2,3]</sup> The reduction peak of Ir/CeO<sub>2</sub> at around 100 °C was much larger than those observed for other supported iridium catalysts, and the reduction peak of the CeO<sub>2</sub> surface at 250–450 °C disappeared: Iridium species would accelerate the reduction of surface Ce<sup>IV</sup>, probably through the migration of surface oxygen species from CeO<sub>2</sub> to iridium species.<sup>[2–5]</sup>

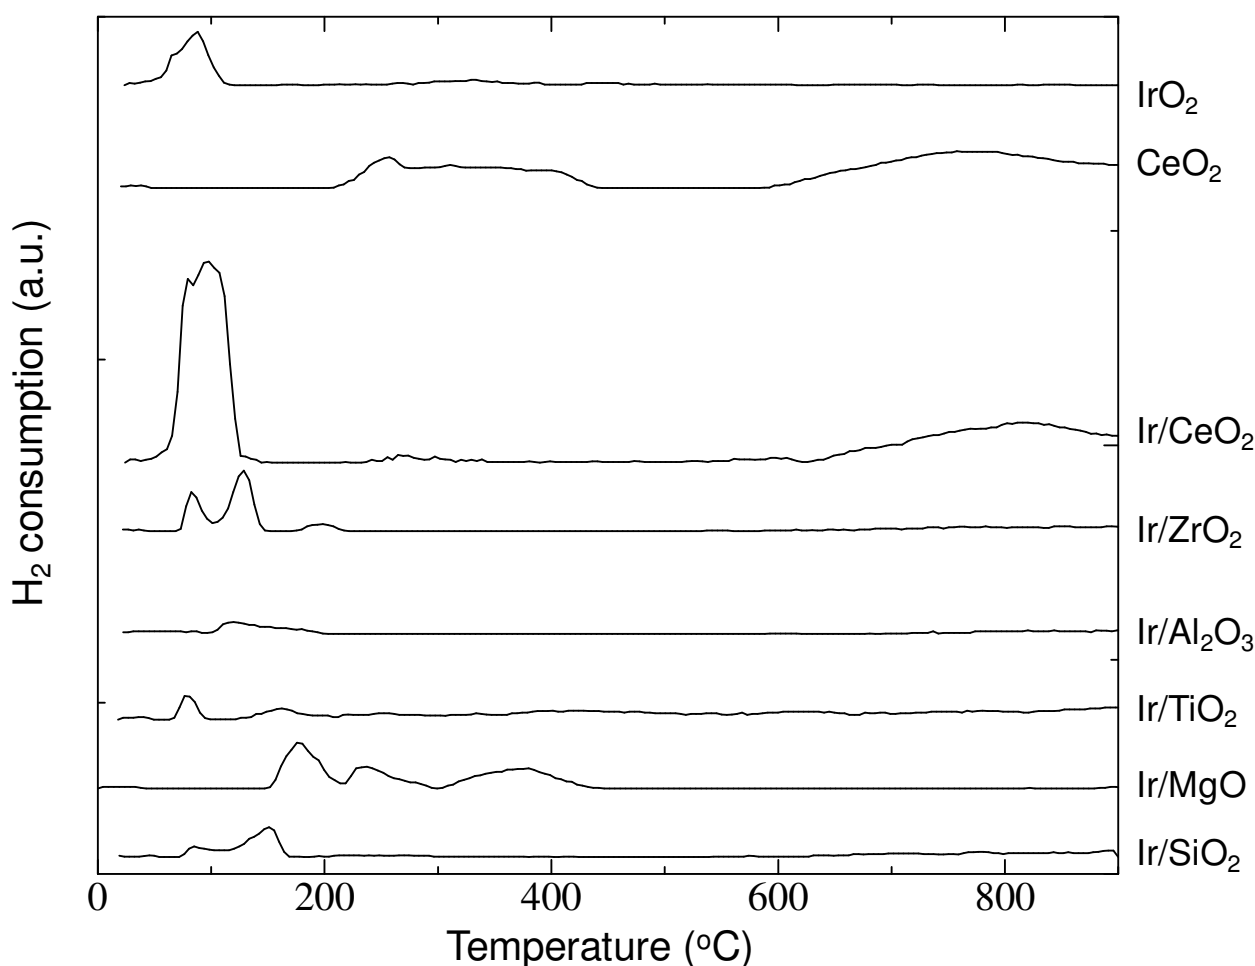

Fig. S3. TPR profiles of supported iridium catalysts

## 2. Dehydrogenation of benzyl alcohol by the Ir/TiO<sub>2</sub> catalyst

The time-course of the reaction of benzyl alcohol (**2a**) (2.0 mmol) in mesitylene (1.0 cm<sup>3</sup>) under an argon atmosphere at 120 °C in the presence of Ir(2.0 wt%)/TiO<sub>2</sub>-500 (0.010 mmol as Ir) is shown in Fig. S4. The major product is benzaldehyde (**4a**) together with a trace amount of benzyl benzoate. At the initial stage the reaction from **2a** to **4a** and H<sub>2</sub> proceeded at a similar rate with the conversion of **1a** by the dehydrogenative synthesis of 2-phenylbenzimidazole, **3aa**. On the other hand, the yield of **4a** from **2a** gradually slowed down after 3 h.

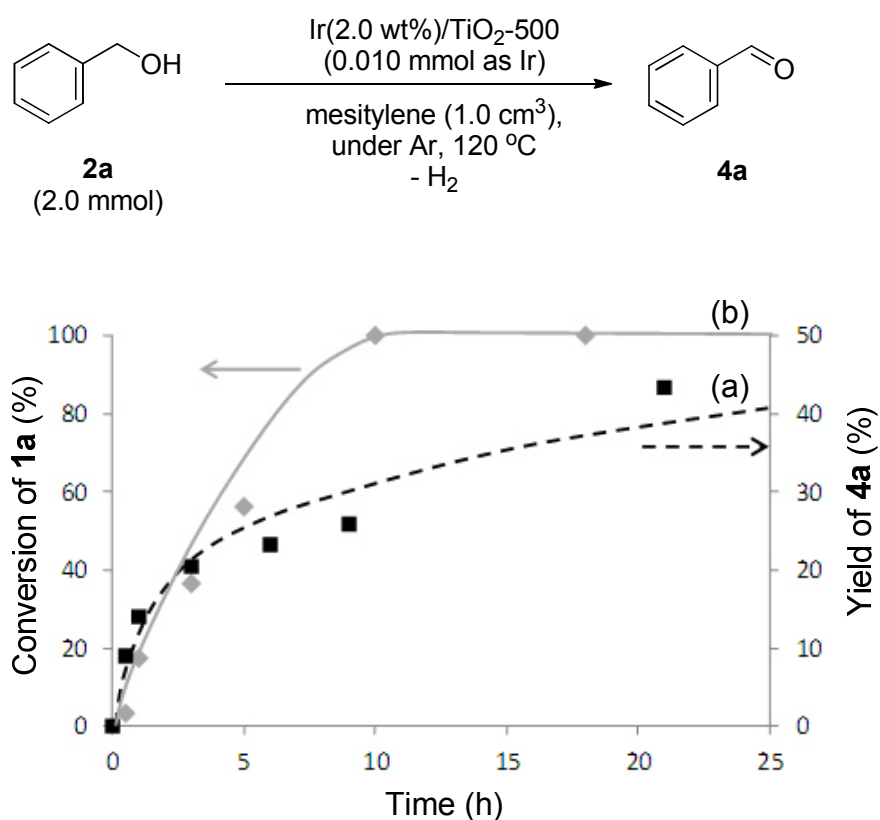

Fig. S4. (a) Time-course of the dehydrogenation of **2a** to **4a**. Solid gray line (b) shows the conversion of **1a** in the dehydrogenative reaction of **1a** with **2a** under the identical conditions for comparison.

Fig. S5 shows the time-course of the reaction of benzyl alcohol (**2a**) (1.0 mmol) in mesitylene (1.0 cm<sup>3</sup>) under an argon atmosphere at 120 °C catalyzed by Ir(2.0 wt%)/TiO<sub>2</sub>-500 (0.010 mmol as Ir) in the presence of benzaldehyde (**4a**) (1.0 mmol). The amount of **4a** was not changed even after the prolonged run and the significant formation of other products was not observed, which clearly indicates that the dehydrogenation of **2a** to **4a** was strongly inhibited by benzaldehyde.

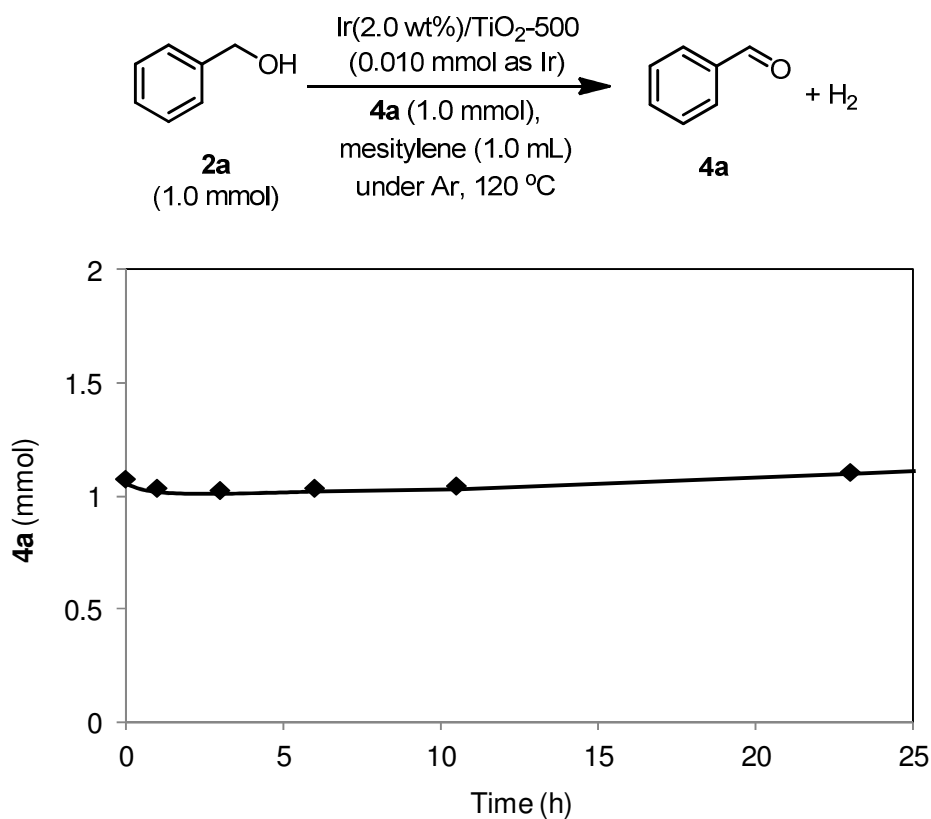

Fig. S5. Time-course of the dehydrogenation of **2a** to **4a** in the presence of **4a** (1.0 mmol).

## References

- 1 F. Moulder, W. F. Stickle, P. E. Sobol and K. D. Bomben, *Handbook of X-ray Photoelectron Spectroscopy*, Perkin-Elmer Co., Eden Prairie USA, 1992.
- 2 K. Wada, S. Hosokawa and M. Inoue, *Catal. Surv. Asia*, 2011, **15**, 1–11
- 3 S. Hosokawa, Y. Hayashi, S. Imamura, K. Wada and M. Inoue, *Catal. Lett.*, 2009, **129**, 394–399.
- 4 S. Hosokawa, H. Kanai, K. Utani, Y. Taniguchi, Y. Saito and S. Imamura, *Appl. Catal. B Environ.*, 2003, **45**, 181–187.
- 5 H. C. Yao and Y. F. Yu Yao, *J. Catal.*, 1984, **86**, 254-265.
